1  
2  
3  
4  
5  
6  
7  
8  
9  
10  
11  
12  
13  
14  
15  
16  
17  
18  
19  
20  
21  
22  
23  
24  
25  
26  
27  
28  
29  
30  
31  
32  
33  
34  
35  
36  
37  
38  
39  
40  
41  
42  
43  
44  
45  
46

Quantification of anti-parasite and anti-disease immunity to malaria as a function of age and exposure

Authors:

Isabel Rodriguez-Barraquer<sup>1</sup>, Emmanuel Arinaitwe<sup>2</sup>, Prasanna Jagannathan<sup>3</sup>, Moses R Kanya<sup>4</sup>, Philip J. Rosenthal<sup>1</sup>, John Rek<sup>2</sup>, Grant Dorsey<sup>1</sup>, Joaniter Nankabirwa<sup>2</sup>, Sarah G. Staedke<sup>5</sup>, Maxwell Kilama<sup>2</sup>, Chris Drakeley<sup>5</sup>, Isaac Ssewanyana<sup>2</sup>, David L Smith<sup>6</sup>, Bryan Greenhouse<sup>1</sup>

<sup>1</sup>Department of Medicine, San Francisco General Hospital, University of California, San Francisco, CA, USA

<sup>2</sup>Infectious Diseases Research Collaboration, Kampala, Uganda

<sup>3</sup>Department of Medicine, Stanford University, Stanford, CA, USA

<sup>4</sup>Department of Medicine, Makerere University College of Health Sciences, Kampala, Uganda

<sup>5</sup>London School of Hygiene and Tropical Medicine, London, United Kingdom

<sup>6</sup>Institute of Health Metrics and Evaluation, University of Washington, Seattle, WA

47 **Abstract**

48 Malaria immunity is complex and multi-faceted, and fundamental gaps remain in our  
49 understanding of how it develops. Here, we use detailed clinical and entomological data  
50 from three parallel cohort studies conducted across the malaria transmission spectrum in  
51 Uganda to quantify the development of immunity against symptomatic *Plasmodium*  
52 *falciparum* as a function of age and transmission intensity. We focus on: anti-parasite  
53 immunity (i.e; ability to control parasite densities) and anti-disease immunity (i.e; ability  
54 to tolerate higher parasite densities without fever). Our findings suggest a strong effect of  
55 age on both types of immunity, that remains significant after adjusting for cumulative  
56 exposure. They also show a non-linear effect of transmission intensity, where children  
57 experiencing the lowest transmission appear to develop immunity faster than those  
58 experiencing higher transmission. These findings illustrate how anti-parasite and anti-  
59 disease immunity develop in parallel, reducing the probability of experiencing  
60 symptomatic malaria upon each subsequent *P. falciparum* infection.

61

62

63

## 64 **Introduction**

65 The last decades have seen substantial declines in malaria transmission in sub-Saharan  
66 Africa that are largely attributable to increased access to effective control measures,  
67 including insecticide-treated bednets, indoor residual spraying of insecticide and  
68 artemisinin-based combination therapy(1,2). In settings where transmission has been low,  
69 increased access to effective control interventions opens the possibility for malaria  
70 elimination. In highly endemic settings, however, there are concerns around the potential  
71 impact of failing to sustain interventions that reduce but do not stop transmission. Short-  
72 term decreases in malaria incidence due to reductions in transmission could be offset over  
73 time by reductions in population immunity to malaria resulting from lower exposure to  
74 parasites (3-5).

75

76 Gradual acquisition of immunity against symptomatic malaria is a key driver of the  
77 epidemiology of malaria in endemic settings, where the incidence of disease typically  
78 peaks in early childhood and then declines, while the prevalence of detectable  
79 asymptomatic parasitemia increases throughout childhood before declining in adulthood  
80 (6-12). While these epidemiologic patterns have been described across the transmission  
81 spectrum, there are still many fundamental gaps in our understanding of the factors  
82 driving the development of immunity, and of the independent roles of age and repeated  
83 infection. One reason it has been challenging to study immunity to malaria is that there  
84 are currently no reliable and quantifiable immune correlates of protection that can be  
85 measured in epidemiological studies. In addition, there are few available datasets that

86 include both detailed clinical data and independent metrics of exposure at the individual  
87 level.

88

89 Here, we use data from three parallel cohort studies conducted across the spectrum of  
90 malaria transmission in Uganda to model and quantify the development of immunity  
91 against symptomatic malaria as a function of transmission intensity and age. A key  
92 strength of these studies is that they involved detailed clinical and entomological  
93 surveillance of all study households. We focus on two specific types of immunity: anti-  
94 parasite immunity (i.e; the ability to control parasite densities upon infection) and anti-  
95 disease immunity (i.e; the ability to tolerate higher parasite infections without developing  
96 objective fever), as they have been described as independent components of clinical  
97 immunity (13).

98

## 99 **Results**

100 The three cohorts enrolled a total of 1021 children aged 6 months to 10 years from 331  
101 randomly chosen households across the three study sites. This analysis was limited to  
102 data from 773 children who experienced at least one patent *P. falciparum* infection  
103 between August 2011 and November 2014. Table 1 summarizes the general  
104 characteristics of the participants included in this analysis.

105

106 Participants living in Nagongera experienced the highest incidences of symptomatic  
107 malaria (median 2.6 episodes per person year), followed by those living in Kihikihi  
108 (median 1.6 episodes per person year) and Walukuba (median 0.6 episodes per person

109 year) (Table 1 and Figure 1). These incidences were consistent with results from monthly  
110 entomological surveys conducted in all cohort households, with significantly higher  
111 annual entomological inoculation rates (aEIR) recorded in Nagongera (median 51  
112 infectious bites per year, range 10-582) as compared to Kihihi (median 8 infectious bites  
113 per year, range 4-47) and Walukuba (median 2 infectious bites per year, range 1-8).  
114 Interestingly, prevalence of asymptomatic parasitemia did not follow this same  
115 relationship; the prevalence of asymptomatic parasitemia was highest in Nagongera, and  
116 prevalences in the lower transmission sites were similar.

117

#### 118 **aEIR as a metric of individual exposure**

119 To assess whether entomological metrics were a good indicator of individual exposure to  
120 *P. falciparum*, we correlated the measured annual EIRs (aEIR) for each household  
121 (Figure 2a) with estimates of the average individual hazard of infection (Figure 2b).  
122 Individual hazards were estimated by fitting time-to-event models to the incidence data  
123 from each site. We found a significant correlation between these two independent metrics  
124 of exposure across sites ( $R^2 = 0.38$ ,  $p < 0.001$ ). While aEIR explained less of the variance  
125 between individuals within each site, the correlation was still significant for both  
126 Nagongera ( $R^2 = 0.03$ ,  $p = 0.005$ ) and Kanungu ( $R^2 = 0.12$ ,  $p < 0.001$ ).

127

#### 128 **Anti-parasite immunity**

129 Parasite densities developed upon infection decreased with increasing age in all settings  
130 and for both symptomatic (passive detection) and asymptomatic (detected during routine  
131 visits) infections. Despite the large variability in parasite densities recorded within and

132 between individuals, this trend is evident in the raw data (Figure 3a). A trend towards  
133 lower parasite densities was also observed among individuals living in settings with  
134 higher aEIRs (Nagongera), as compared to settings with lower aEIR (Kihhi and  
135 Walukuba).

136

137 We considered multiple candidate models to describe the association between parasite  
138 density, age and aEIR (supplementary material). Models allowing smooth (non-linear)  
139 relationships with aEIR best fit the data. Models allowing for two-way interactions  
140 between age and aEIR also outperformed models that didn't include interactions.

141

142 In moderate and high transmission settings (households with aEIR >5), increasing age  
143 and increasing exposure were independently associated with decreases in the parasite  
144 densities. On average, parasite densities decreased by a factor of 0.76 (95%CI 0.74-0.77)  
145 for each additional year of age and by a factor of 0.73 (95%CI 0.70-0.76) for each two-  
146 fold increase in the aEIR. The relationship was less evident for the lower transmission  
147 households (aEIR<5). In these settings, there continued to be a decreasing association  
148 with age, but the expected parasite densities at any given age were equal or lower to those  
149 observed in the higher exposure (aEIR>10) settings.

150

151 Figures 4a and 5a present the predicted parasite densities, as a function of age and aEIR,  
152 according to the best fitting model. While an individual aged 1 year exposed to an aEIR  
153 of 10 is expected to develop a parasite density of 14610 parasites/ $\mu$ L (95%CI 5924–  
154 36031 parasites/ $\mu$ L) upon infection, the expected parasite density goes down to 3237

155 parasites/ $\mu$ L (95%CI 1381–7586 parasites/ $\mu$ L) by age 10 years. In contrast, the expected  
156 parasite density in an individual living in a setting with aEIR of 150 will be similar 13071  
157 parasites/ $\mu$ L (95%CI 5256– 32503 parasites/ $\mu$ L) at age 1 year, but significantly lower by  
158 age 10 years (999 parasites/ $\mu$ L (95%CI 398–2508 parasites/ $\mu$ L )).

159

160 To test whether the observed associations with age could be explained by the cumulative  
161 exposure over a life time, we also fit models where, instead of adjusting for the aEIR, we  
162 adjusted for the cumulative number of infectious bites (i.e. the product of age and aEIR).  
163 Results from these models are consistent with a smaller, yet independent effect of age on  
164 the development of anti-parasite immunity; for any given level of cumulative exposure,  
165 each additional year of life was associated with decreases in parasite densities by a factor  
166 of 0.82 (95%CI 0.81-0.85).

167

### 168 **Anti-disease immunity**

169 We define anti-disease immunity as the ability to tolerate a given parasite density without  
170 developing objective fever. Thus, we were interested in modeling temperatures recorded  
171 at specific parasite densities, as a function of age and aEIR. Similar to the models  
172 characterizing anti-parasite immunity, models including smooth effects and interactions  
173 outperformed simpler models.

174

175 As expected, we found a strong association between parasite densities and objective  
176 temperature (Figure S1). Increases in parasite densities above 1000 parasites/ $\mu$ L were  
177 associated with higher expected temperatures across ages and transmission settings. In

178 addition, we found a negative association between objective temperature at a given  
179 parasite density and age (Figures 3b, 4b and 6). In moderate and high transmission  
180 settings (aEIR>5), the objective temperature at a given parasite density decreased on  
181 average by 0.08 °C (95%CI 0.07-0.10 °C) for each additional year of life. Thus, while the  
182 expected temperature for a child aged 1 year living in a setting with aEIR of 10 with a  
183 parasite density of 40,000 would be 38.8 °C (95% CI 38.5-39.2 °C), the expected  
184 temperature would decrease to 37.6 °C (95% CI 37.3-38.0 °C) if the same child  
185 experienced the infection at age 10 years (Figure 6). This association was similar and  
186 remained significant even when adjusting for cumulative exposure and for the differences  
187 in incidence of non-malarial fever across age-groups (Figure S3).

188

189 Similar to the anti-parasite immunity results described above, the observed association  
190 between exposure level and anti-disease immunity was less evident than the association  
191 with age. For moderate and high transmission settings (aEIR 5 to 300) there was a clear  
192 negative association between objective temperature at a given parasite density and aEIR.  
193 The objective temperature decreased by 0.07 °C (95%CI 0.05-0.10 °C) for each two-fold  
194 increase in aEIR. However, the relationship did not follow this trend for lower  
195 transmission settings. Children living in the lowest transmission settings (aEIR 1 to 5)  
196 appeared to tolerate higher parasite densities than children living in moderate  
197 transmission settings (aEIR 5 to 10).

198



199 As an alternative way to characterize anti-disease immunity, we used our best fitting  
200 model to predict the fever threshold, defined as the minimum parasite density associated  
201 with objective fever (temperature > 38 °C), across levels of age and aEIR (figure 5b).  
202 Results from this analysis show that, for settings with moderate and high transmission  
203 (aEIR > 5), the fever threshold increases both with age and increasing exposure. Thus,  
204 while a 1 year old child living in a setting with aEIR of 10 presenting with a parasite  
205 density as low as 3747 parasites/μL (95%CI 777-11129 parasites/μL) will be expected to  
206 be febrile, children older than 6 years of age exposed to very high transmission (aEIR  
207 150) might be afebrile even with parasite densities higher than 60000 parasites/μL.

208

### 209 **Overall immunity against symptomatic malaria**

210 Finally, to characterize the association between age and aEIR on the overall risk of  
211 developing symptomatic malaria upon infection (i.e.; the combined effect of anti-parasite  
212 and anti-disease immunity), we fit a series of models where the outcome of each  
213 independent observed infection (i.e.; symptomatic malaria or asymptomatic parasitemia)  
214 was modeled as a function of age and aEIR.

215 Results from this analysis are consistent with results from the anti-parasite and anti-  
216 disease models (Figure 7). While young children living in low transmission settings  
217 (aEIR=5) are expected to develop symptomatic malaria in most their infections, the  
218 probability that an infection results in symptomatic malaria decreases as a function of age  
219 and exposure. The expected probability of symptomatic disease for a child aged 1 year  
220 living in a setting with aEIR of 50 is 0.92 (95%CI 0.79-0.97), but it decreases to 0.51  
221 (95%CI 0.29-0.73) by age 10 years.

222

### 223 **Sensitivity analyses**

224 Our main analyses include data from all visits regardless of their type (routine vs passive  
225 case detection). Thus, the expected values modeled here may be biased by the frequency  
226 of active vs passive episodes detected. In particular, it is possible that we have under-  
227 sampled the instances of asymptomatic disease, and thus, our estimates of the expected  
228 parasite densities may be an over-estimate of those present in the population. To address  
229 this, we performed sensitivity analyses where we up-weighted the episodes of  
230 asymptomatic parasitemia, to account for potentially unobserved asymptomatic  
231 infections. Results from these analyses were qualitatively identical to the main analysis  
232 reported here and are presented in the supplementary material (Figure S4).

233

234 To explore whether differences in the prevalence of certain host genetic polymorphisms  
235 between sites could be driving some of our findings, we also performed sensitivity  
236 analyses limiting the dataset to those subjects without the sickle hemoglobin mutation ( $\beta$   
237 globin E6V), known to protect against malaria (17,18). Even though the sample size of  
238 these analyses was significantly smaller, results were unchanged qualitatively (Figure  
239 S5). Similarly, restricting the dataset to children without two other known  
240 polymorphisms (the  $\alpha$ -thalassemia 3.7 kb deletion or glucose-6-phosphate dehydrogenase  
241 deficiency caused by the common African variant (G6PD A-)), had little effect on the  
242 results.

243

### 244 **Discussion**

245 Our findings illustrate how anti-parasite and anti-disease immunity develop gradually and  
246 in parallel, complementing each other in reducing the probability of experiencing  
247 symptomatic disease upon infection with *P. falciparum*. While anti-parasite immunity  
248 acts to restrict the parasite densities that develop upon each subsequent infection, anti-  
249 disease immunity increases the tolerance to high parasite densities. Thus, older children  
250 are less likely to develop symptomatic malaria upon infection both because they tolerate  
251 parasite densities better without developing fever, and because they are less likely to  
252 develop high parasite densities.

253

254 Our results indicate independent effects of age on the acquisition of both anti-parasite and  
255 anti-disease immunity. These independent age effects may reflect maturation of the  
256 immune system as well as other physiological changes that decrease the propensity to  
257 fever (13,19). Furthermore, our findings are consistent with independent effects of  
258 transmission intensity on the acquisition of these two types of immunity. While the  
259 results obtained for moderate and high transmission settings ( $aEIR > 5$ ) are consistent and  
260 expected, and suggest that immunity develops faster in settings where individuals get  
261 infected by *P. falciparum* more often, the results obtained for the lowest transmission  
262 settings are harder to reconcile. These results were largely driven by observations  
263 collected in the Walukuba site, and as such it is possible that site-specific characteristics  
264 may have driven them. Walukuba was previously a relatively high transmission rural  
265 area, but substantial decreases in transmission intensity have been observed since 2011,  
266 likely due to urbanization. While our sensitivity analyses suggested that differences in the  
267 prevalence of three well characterized host-genetic polymorphisms between sites do not

268 explain these discrepant results, it is still possible that other unmeasured site-specific  
269 characteristics may have driven them. A lower parasite diversity in Walukuba, for  
270 example, could cause this difference, as developing an effective immune response against  
271 fewer parasite strains may be much easier than developing immunity against a more  
272 diverse pool (20,21). Testing this hypothesis would require careful characterization of the  
273 complexity and diversity of infections in each of our cohort settings.

274

275 While site specific characteristics may underlie the observed high levels of clinical  
276 immunity against malaria in the low transmission setting, it is also possible that this  
277 finding reflects biologically relevant differences in how immunity against malaria  
278 develops. For example, it has been hypothesized that immunity may develop optimally in  
279 individuals that are exposed at a low rate, and that more frequent infections may interfere  
280 with the development of robust immune responses (22,23). Answering this question will  
281 require further detailed studies across transmission settings, with careful characterization  
282 of both exposure and infection outcomes.

283 There are several limitations to this study. With a study design including routine visits  
284 every 3 months, we are likely to have missed several asymptomatic infections,  
285 particularly in the moderate and high transmission settings. Moreover, since infections  
286 were detected using microscopy, we were unable to detect sub-patent infections, and we  
287 lack knowledge about the genetic complexity of each infection. While it is possible that  
288 the expected values modeled here (expected parasite density and fever threshold) were  
289 biased by these sources of measurement error, sensitivity analyses suggest that the  
290 relationships observed were robust. Secondly, while we found an independent association

291 between the average household aEIR and both anti-parasite and anti-disease immunity, it  
292 is not clear that this is the most relevant metric of exposure for the development of  
293 clinical immunity to malaria. Alternative metrics such as the number of discrete  
294 infections, the number of “strains” seen or the total parasite-positive time might be more  
295 relevant, but require the collection of additional data, including more frequent sampling.  
296 Finally, while this study provides very detailed insight into how two types of clinical  
297 immunity to malaria develop in endemic settings as a function of age and repeated  
298 exposure, it says nothing about the duration of immunity.

299

300 Prior studies have tried to model the processes driving acquisition of clinical immunity  
301 against malaria. However, these models have been generally informed by aggregated  
302 epidemiological data (age-incidence and age-prevalence) which limits their capacity to  
303 isolate the contributions of age and repeated exposure (24-26). Our results quantify how  
304 anti-parasite and anti-disease immunity develop in children across the malaria  
305 transmission spectrum, and they support strong a strong independent effect of age and a  
306 perhaps paradoxical effect of exposure. The methods proposed here to model anti-  
307 parasite and anti-disease immunity may also provide a framework to select individuals  
308 with immune and non-immune phenotypes for evaluations of immune correlates of  
309 protection.

310

311 **Methods**

312 **Ethics Statement**

313 The study protocol was reviewed and approved by the Makerere University School of  
314 Medicine Research and Ethics Committee, the Uganda National Council for Science and  
315 Technology, the London School of Hygiene & Tropical Medicine Ethics Committee, the  
316 Durham University School of Biological and Biomedical Sciences Ethics Committee, and  
317 the University of California, San Francisco, Committee on Human Research. All  
318 parents/guardians were asked to provide written informed consent at the time of  
319 enrollment.

320

### 321 **Data**

322 We used data from three parallel cohort studies conducted in Uganda in sub-counties  
323 chosen to represent varied malaria transmission(14). Walukuba, in Jinja district, is a peri-  
324 urban area near Lake Victoria that has the lowest transmission among the three (annual  
325 entomological inoculation rate (aEIR) estimated to be 2.8(14)). Kihhihi, in Kanungu  
326 district, is a rural area in southwestern Uganda characterized by moderate transmission  
327 (aEIR=32). Nagongera, Tororo district, is a rural area in southeastern Uganda with the  
328 highest transmission (aEIR=310)(14,15). Details on how the study households and  
329 participants were selected has been described elsewhere(14). Briefly, all households were  
330 enumerated, and then approximately 100 households were selected at random from each  
331 site. Between August and September 2011, all children from these households aged  
332 between 6 months and 10 years who met eligibility criteria were invited to participate. As  
333 the cohorts were dynamic, additional children from participating households were invited  
334 to participate if they became eligible while the study was ongoing. Unless participants  
335 were withdrawn from the study either voluntarily or because they failed to comply with

336 study visits, they were followed-up until they reached 11 years of age. Children from 31  
337 randomly selected additional households were enrolled between August and October  
338 2013 to replace households in which all study participants had been withdrawn. For this  
339 analysis, we used data collected from visits between August 2011 and November 2014.  
340 The studies included passive and active follow-up of participants. Parents/guardians were  
341 encouraged to bring their children to designated study clinics for any illness. All medical  
342 care was provided free of charge, and participants were reimbursed for transportation  
343 costs. All children who reported fever in the previous 24 hours or were febrile at the time  
344 of the visit (tympanic temperature  $> 38.0^{\circ}\text{C}$ ) were tested for malaria infection with a  
345 thick blood smear. Light microscopy was performed by an experienced laboratory  
346 technician who was not involved in direct patient care and verified by a second  
347 technician. Parasite density was calculated by counting the number of asexual parasites  
348 per 200 leukocytes (or per 500 leukocytes, if the count was  $<10$  asexual parasites/200  
349 leukocytes), assuming a leukocyte count of  $8,000/\mu\text{l}$ . A blood smear was considered  
350 negative when no asexual parasites were found after examination of 100 high power  
351 fields.  
352 If the smear was positive, the patient was diagnosed with symptomatic malaria and  
353 received treatment with artemether-lumefantrine (AL), the recommended first-line  
354 treatment in Uganda. Episodes of complicated or recurrent malaria occurring within 14  
355 days of therapy were treated with quinine. In addition, routine evaluations were  
356 performed every three months, including testing for asymptomatic parasitemia using  
357 thick blood smears.  
358

359 Entomological surveys were also conducted every month at all study households. During  
360 these surveys, mosquitoes were collected using miniature CDC light traps (Model 512;  
361 John W. Hock Company). Established taxonomic keys were used to identify  
362 female *Anopheles* mosquitoes. Individual mosquitoes were tested for sporozoites using an  
363 ELISA technique (15). All female *Anopheles* mosquitoes captured in Walukuba and  
364 Kihihi were tested; in Nagongera testing was limited to 50 randomly selected female  
365 *Anopheles* mosquitoes per household per night due to the large numbers collected.  
366 Therefore, for each household and/or site it was possible to calculate multiple  
367 entomological metrics, including the average human biting rate (average number of  
368 female *Anopheles* mosquitoes caught in a household per day), the average sporozoite rate  
369 (the average proportion of mosquitos that tested positive for *Plasmodium falciparum*) and  
370 the entomological inoculation rate (EIR, the product of the household human biting rate  
371 and the site sporozoite rate).

372

### 373 **Statistical analyses**

374 The purpose of these analyses was to model and quantify the development of immunity  
375 against symptomatic malaria, as a function of age and exposure, measured by the  
376 household EIR.

377 We modeled two specific types of immunity that have been previously described as  
378 components of immunity to malaria. We defined anti-parasite immunity as the ability to  
379 control parasite densities upon infection and anti-disease immunity as the ability to  
380 tolerate parasite infections without developing objective fever. Thus, for models of anti-  
381 parasite immunity, the outcome of interest was the parasite density recorded (using thick



382 blood smear) at each parasite positive study visit. For models of anti-disease immunity  
383 the outcome of interest was the objective temperature recorded during parasite positive  
384 visits, conditional on the parasite density. In addition, we also modeled overall immunity  
385 against symptomatic malaria. For these analyses, the outcome of interest was the  
386 probability of presenting with fever given infection (parasite positivity).

387

388 In order to model the association between the outcomes and covariates of interest we  
389 used generalized additive models (gams). Gams provide a good framework, as they allow  
390 for smooth non-linear relationships. Details on the specific models explored are provided  
391 in the supplementary material. In summary, the models followed the following form.

392

393 1) Anti-parasite immunity

394

$$395 \quad \text{Log}_{10}(\text{Parasite density})_{ijk} = f(\text{age}_{ijk}, \text{Log}_2 aEIR_j)$$

396 2) Anti- Disease immunity

397

$$398 \quad \text{Temperature}_{ijk} = f(\text{age}_{ijk}, \text{Log}_2 aEIR_j, \text{Log}_{10} \text{Parasite density}_{ijk})$$

399

400 3) Overall immunity against symptomatic malaria

401

$$402 \quad P(\text{symptomatic malaria upon infection})_{ijk} = f(\text{age}_{ijk}, \text{Log}_2 aEIR_j)$$

403

404 Where  $i$  is an index for individuals,  $j$  for households and  $k$  for specific visits. Thus,  
405  $age_{ijk}$  represents the age of child  $i$  from household  $j$  during visit  $k$ , and  $aEIR_j$  represents  
406 the average annual EIR recorded for household  $j$ . We included the EIR as an average  
407 (time-invariant) covariate, as we were interested in modeling the impact of the average  
408 exposure to malaria over time on the development of clinical immunity.

409 All models were fitted in the R statistical framework using package `mgcv(16)`. To  
410 account for clustering, all models included random effects at the individual and  
411 household levels. Best fitting models were selected based on Akaike's Informaiton  
412 Criterion and the percent deviance explained.

413

#### 414 **Acknowledgements**

415 We thank all study participants who participated in this study and their families.

416 We also thank hank the study team and the Makerere University–UCSF Research  
417 Collaboration and the Infectious Diseases Research Collaboration for administrative and  
418 technical support.

419

#### 420 **Competing interests**

421 None

422

#### 423 **References**

424

425

- 426 1. Bhatt S, Weiss DJ, Cameron E, Bisanzio D, Mappin B, Dalrymple U, et al. The  
427 effect of malaria control on *Plasmodium falciparum* in Africa between 2000 and  
428 2015. *Nature*. Nature Publishing Group; 2015 Sep 16;526(7572):207–11.
- 429 2. World Health Organization (WHO). World malaria report 2016. Geneva: WHO.  
430 Embargoed until; 2016.

- 431 3. Filipe JAN, Riley EM, Drakeley CJ, Sutherland CJ, Ghani AC. Determination of  
432 the Processes Driving the Acquisition of Immunity to Malaria Using a  
433 Mathematical Transmission Model. PLoS Comput Biol. Public Library of Science;  
434 2007 Dec 28;3(12):e255.
- 435 4. Smith TA, Leuenberger R, Lengeler C. Child mortality and malaria transmission  
436 intensity in Africa. Trends in Parasitology. 2001 Mar;17(3):145–9.
- 437 5. Snow RW, Omumbo JA, Lowe B, Molyneux CS, Obiero J-O, Palmer A, et al.  
438 Relation between severe malaria morbidity in children and level of Plasmodium  
439 falciparum transmission in Africa. The Lancet. 1997 Jun;349(9066):1650–4.
- 440 6. Griffin JT, Hollingsworth TD, Reyburn H, Drakeley CJ, Riley EM, Ghani AC.  
441 Gradual acquisition of immunity to severe malaria with increasing exposure.  
442 Proceedings of the Royal Society of London B: Biological Sciences. The Royal  
443 Society; 2015 Feb 22;282(1801):20142657.
- 444 7. Reyburn H, Mbatia R, Drakeley C, Bruce J, Carneiro I, Olomi R, et al. Association  
445 of transmission intensity and age with clinical manifestations and case fatality of  
446 severe Plasmodium falciparum malaria. JAMA. 2005 ed. 2005 Mar  
447 23;293(12):1461–70.
- 448 8. Okiro EA, Al-Taiar A, Reyburn H, Idro R, Berkley JA, Snow RW. Age patterns of  
449 severe paediatric malaria and their relationship to Plasmodium falciparum  
450 transmission intensity. Malar J. 2009 ed. 2009;8:4.
- 451 9. Carneiro I, Roca-Feltrer A, Griffin JT, Smith L, Tanner M, Schellenberg JA, et al.  
452 Age-patterns of malaria vary with severity, transmission intensity and seasonality  
453 in sub-Saharan Africa: a systematic review and pooled analysis. PLoS ONE.  
454 2010;5(2):e8988.
- 455 10. Idro R, Aloyo J, Mayende L, Bitarakwate E, John CC, Kivumbi GW. Severe  
456 malaria in children in areas with low, moderate and high transmission intensity in  
457 Uganda. Tropical medicine & international health : TM & IH. 2006  
458 Jan;11(1):115–24.
- 459 11. Roca-Feltrer A, Carneiro I, Smith L, Schellenberg JR, Greenwood B, Schellenberg  
460 D. The age patterns of severe malaria syndromes in sub-Saharan Africa across a  
461 range of transmission intensities and seasonality settings. Malar J. 2010;9:282.
- 462 12. Rodríguez-Barraquer I, Arinaitwe E, Jagannathan P, Boyle MJ, Tappero J,  
463 Muhindo M, et al. Quantifying Heterogeneous Malaria Exposure and Clinical  
464 Protection in a Cohort of Ugandan Children. J Infect Dis. Oxford University Press;  
465 2016 Oct 1;214(7):1072–80.
- 466 13. Struik SS, Riley EM. Does malaria suffer from lack of memory? Immunological  
467 Reviews. Munksgaard International Publishers; 2004 Oct 1;201(1):268–90.

- 468 14. Kanya MR, Arinaitwe E, Wanzira H, Katureebe A, Barusya C, Kigozi SP, et al.  
469 Malaria transmission, infection, and disease at three sites with varied transmission  
470 intensity in Uganda: implications for malaria control. *Am J Trop Med Hyg.* 2015  
471 May;92(5):903–12.
- 472 15. Kilama M, Smith DL, Hutchinson R, Kigozi R, Yeka A, Lavoy G, et al.  
473 Estimating the annual entomological inoculation rate for *Plasmodium falciparum*  
474 transmitted by *Anopheles gambiae* s.l. using three sampling methods in three sites  
475 in Uganda. *Malar J.* 2014 Mar 21;13(1):111.
- 476 16. R Foundation for Statistical Computing. R:anguage and environment for statistical  
477 computing [Internet]. Vienna. Available from: <http://www.R-project.org/>
- 478 17. Lopera-Mesa TM, Doumbia S, Konaté D, Anderson JM, Doumbouya M, Keita  
479 AS, et al. Effect of red blood cell variants on childhood malaria in Mali: a  
480 prospective cohort study. *The Lancet Haematology.* Elsevier; 2015 Apr;2(4):e140–  
481 9.
- 482 18. Taylor SM, Parobek CM, Fairhurst RM. Haemoglobinopathies and the clinical  
483 epidemiology of malaria: a systematic review and meta-analysis. *The Lancet*  
484 *Infectious Diseases.* 2012 Jun;12(6):457–68.
- 485 19. Baird JK. Age dependent characteristics of protection v. susceptibility to  
486 *Plasmodium falciparum*. *Annals of Tropical Medicine And Parasitology.*  
487 Routledge, part of the Taylor & Francis Group; 1998 Jun 1;92(4):367–90.
- 488 20. Hviid L. Clinical disease, immunity and protection against *Plasmodium falciparum*  
489 malaria in populations living in endemic areas. *Expert reviews in molecular*  
490 *medicine.* Cambridge University Press; 1998 Jun 24;1998(04):1–10.
- 491 21. Bull PC, Lowe BS, Kortok M, Molyneux CS, Newbold CI, Marsh K. Parasite  
492 antigens on the infected red cell surface are targets for naturally acquired immunity  
493 to malaria. *Nature medicine.* Europe PMC Funders; 1998 Mar;4(3):358–60.
- 494 22. Wipasa J, Suphavitai C, Okell LC, Cook J, Corran PH, Thaikla K, et al. Long-  
495 Lived Antibody and B Cell Memory Responses to the Human Malaria Parasites,  
496 *Plasmodium falciparum* and *Plasmodium vivax*. Kazura JW, editor. *PLoS Pathog.*  
497 *Public Library of Science;* 2010 Feb 19;6(2):e1000770.
- 498 23. Langhorne J, Ndungu FM, Sponaas A-M, Marsh K. Immunity to malaria: more  
499 questions than answers. *Nature Immunology.* Nature Publishing Group; 2008 Jul  
500 1;9(7):725–32.
- 501 24. Filipe JA, Riley EM, Drakeley CJ, Sutherland CJ, Ghani AC. Determination of the  
502 processes driving the acquisition of immunity to malaria using a mathematical  
503 transmission model. *PLoS Comput Biol.* 2007 Dec;3(12):e255.
- 504 25. Griffin JT, Hollingsworth TD, Reyburn H, Drakeley CJ, Riley EM, Ghani AC.

505 Gradual acquisition of immunity to severe malaria with increasing exposure.  
506 Proceedings Biological sciences / The Royal Society. 2015 Feb 22;282(1801).

507 26. Griffin JT, Ferguson NM, Ghani AC. Estimates of the changing age-burden of  
508 Plasmodium falciparum malaria disease in sub-Saharan Africa. Nat Commun.  
509 Nature Publishing Group; 2014;5:3136.

510

511

512

513

514

515

516

517

518

519

520

521

522

523

524

525

526

527

528

529

530

531

532

533

534

535

536

537

538

539

540

541

542

543

544

545

546

547

548

549  
550  
551  
552  
553  
554  
555  
556  
557

## Tables and figures

Table 1: Characteristics of the study participants

| Characteristic                                                            | Nagongera        | Kihihi           | Walukuba         |
|---------------------------------------------------------------------------|------------------|------------------|------------------|
| Number of households                                                      | 106              | 100              | 76               |
| Number of children                                                        | 329              | 305              | 139              |
| Female, <i>n</i> (%)                                                      | 151(46)          | 150 (49)         | 66 (47)          |
| Mean age at enrollment, years ( <i>sd</i> )                               | 4.4 (2.7)        | 4.6(2.6)         | 4.3 (2.6)        |
| Mean follow up time, months (range)                                       | 23.5 (0, 38.8)   | 24.4 (0.8, 38.8) | 22.1 (2.3, 3.9)  |
| <i>Symptomatic malaria</i>                                                |                  |                  |                  |
| Symptomatic Malaria episodes, <i>n</i>                                    | 2447             | 1555             | 207              |
| Median number of symptomatic malaria episodes/child, <i>n</i> (range)     | 6 (0, 29)        | 4 (0, 30)        | 1 (0, 12)        |
| Median incidence of symptomatic malaria episodes ppy (range)              | 2.6(0, 10)       | 1.6 (0, 15.2)    | 0.6 (0, 5.1)     |
| <i>Asymptomatic parasitemia</i>                                           |                  |                  |                  |
| Asymptomatic parasitemia episodes, <i>n</i>                               | 955              | 331              | 145              |
| Median number of asymptomatic parasitemia episode/child, <i>n</i> (range) | 2 (0, 12)        | 0 (0, 11)        | 1 (0, 10)        |
| Median prevalence of asymptomatic parasitemia (range)                     | 0.12 (0.07-0.17) | 0.05 (0.02-0.10) | 0.07 (0.03-0.11) |
| <i>Household malaria exposure</i>                                         |                  |                  |                  |
| Household aEIR, median (range)                                            | 51 (10-582)      | 7.7 (3.6-47)     | 2.1 (1.5-8.1)    |

558  
559  
560  
561  
562  
563  
564  
565  
566  
567  
568  
569  
570  
571  
572  
573

574  
575  
576  
577

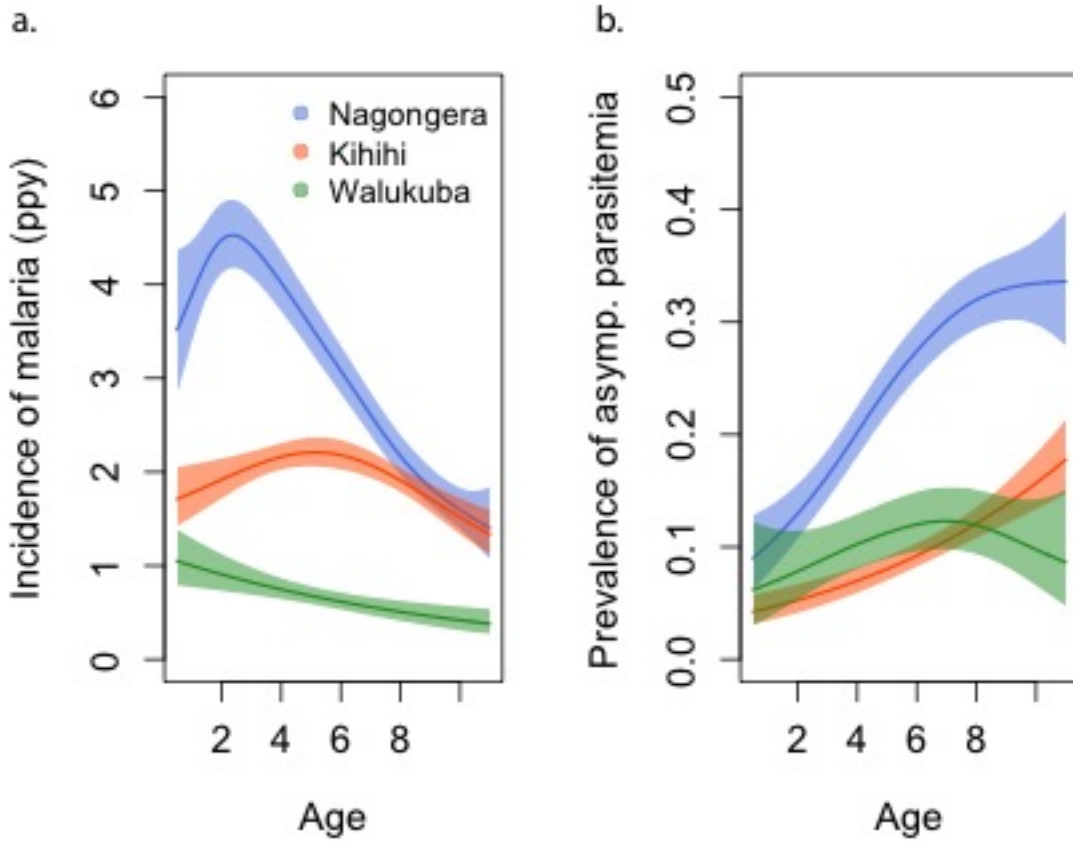

578  
579  
580  
581  
582  
583  
584  
585  
586  
587  
588  
589  
590  
591  
592

Figure 1: Incidence of malaria (a) and prevalence of asymptomatic parasitemia (b) in the three study sites as a function of age. Shaded areas represent 95% confidence bounds.

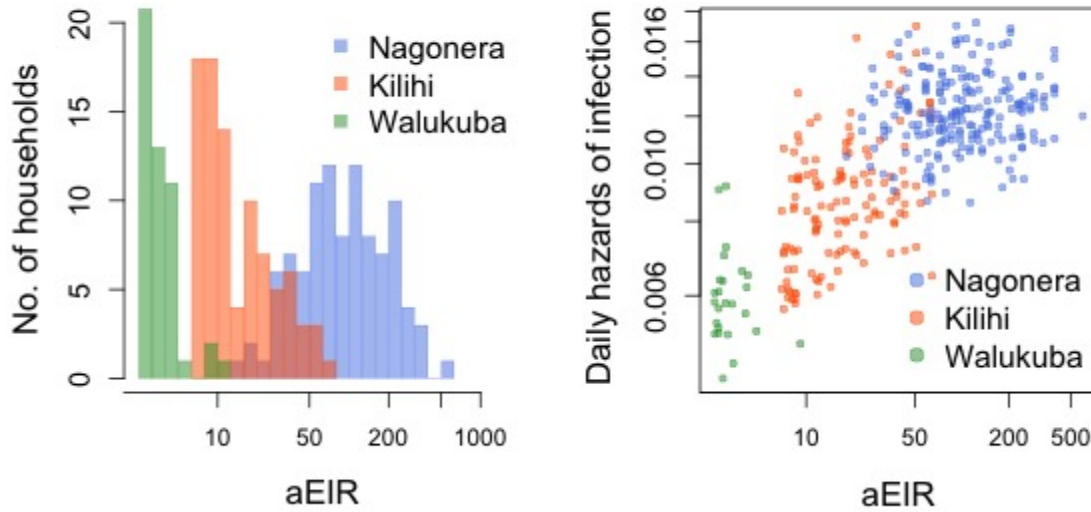

593  
594  
595  
596  
597  
598  
599  
600  
601  
602  
603  
604  
605  
606  
607  
608  
609  
610  
611  
612  
613  
614  
615  
616  
617  
618  
619  
620  
621

Figure 2: **a.** Distribution of the average annual entomological inoculation rate (aEIR) experienced by the study households in the three study sites. **b.** Correlation between the measured aEIRs and the estimated individual hazards of infection.



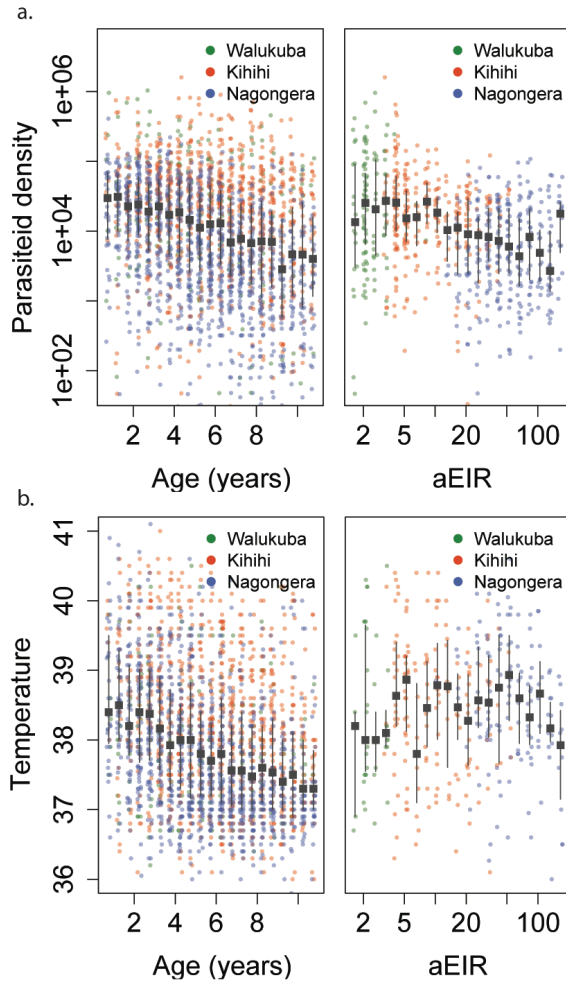

622  
623  
624  
625  
626  
627  
628  
629  
630  
631  
632  
633  
634  
635  
636  
637  
638

Figure 3: Trends in parasite densities **(a)** recorded during symptomatic (passive surveillance) infections and routine (active surveillance) visits as a function of age (left) and aEIR (right); and trends in the objective temperature **(b)** recorded during visits in which participants were found to have a parasite density between 50,000 parasites/ $\mu$ L and 200,000 parasites/ $\mu$ L, as a function of age (left) and aEIR (right). Each point represents a measurement obtained during a study visit. The median and interquartile range are shown in black.

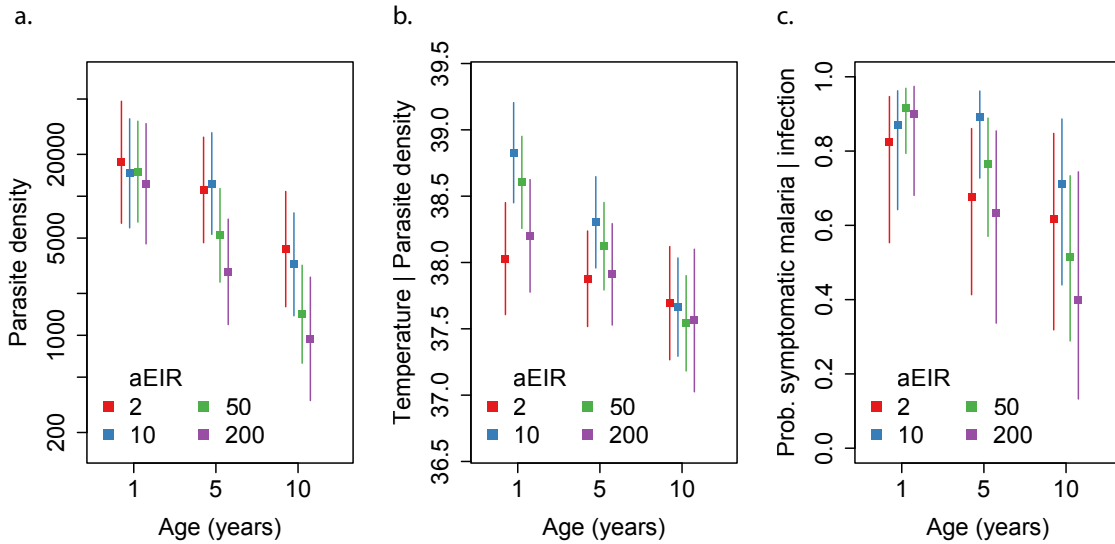

639

640

641 Figure 4: Results from models quantifying anti-parasite immunity **(a)**, anti-disease  
642 immunity **(b)** and overall immunity against symptomatic malaria **(c)**. Each plot shows,  
643 for specific ages and aEIRs, the expected parasite density ( $\mu\text{L}$ ) **(a)**, objective temperature  
644 given a density of 40,000 parasites/ $\mu\text{L}$  **(b)** and the probability of developing symptomatic  
645 malaria upon infection **(c)**, estimated using the best fitting model. 95% confidence  
646 intervals of the estimates are also shown.

647

648

649

650

651

652

653

654

655

656

657

658

659

660

661

662

663

664

665

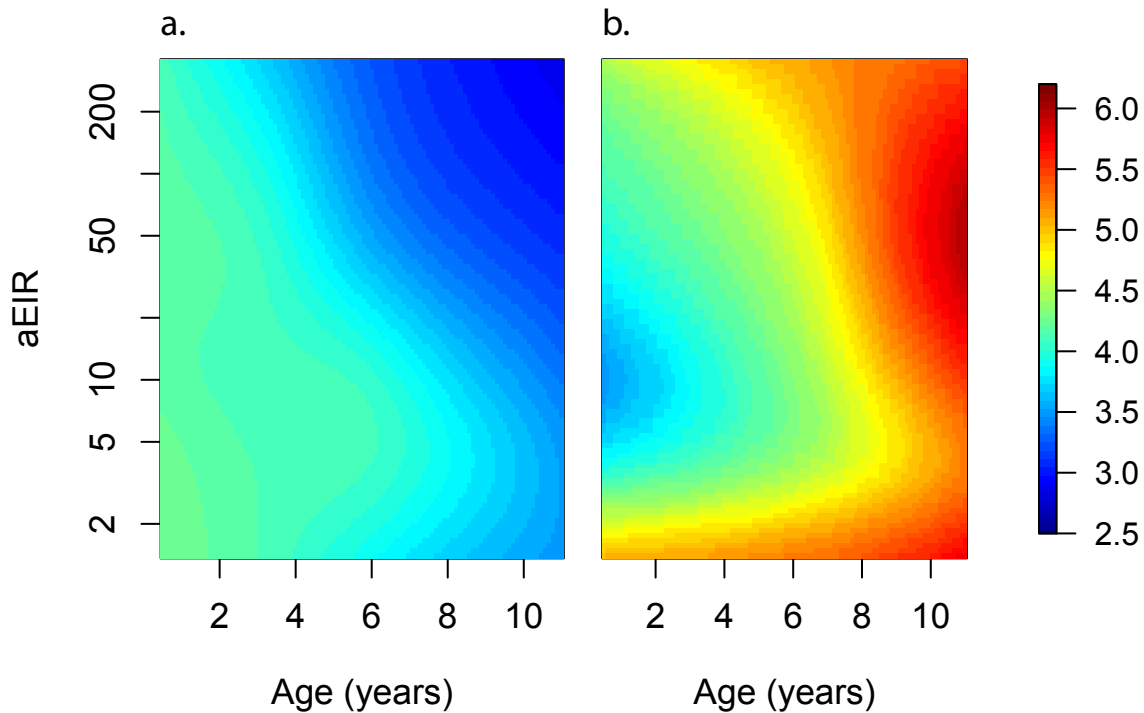

666  
667  
668  
669  
670  
671  
672  
673  
674  
675  
676  
677  
678

Figure 5. Results of models quantifying anti-parasite (a) and anti-disease immunity (b). These results are similar to those presented in Figure 4, but for the full range of ages and aEIRs included in the data. Panel a. shows expected parasite densities (log 10) after infection at different ages and levels of exposure (aEIR). Panel b. shows the expected fever thresholds (parasite densities required to develop a temperature 38°C or greater). Variance estimates for these plots are presented in the supplementary materials.

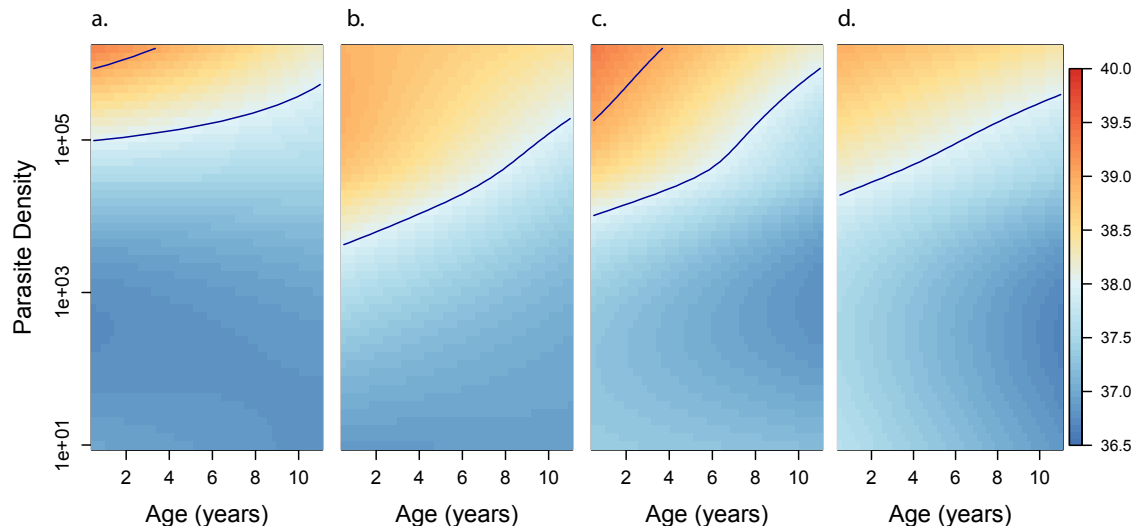

679  
680  
681  
682  
683  
684  
685  
686  
687  
688  
689  
690  
691  
692  
693  
694  
695

Figure 6. Results of the best model quantifying anti-disease immunity. Each panel shows how the expected objective temperature (°C) varies as a function of age and parasite density, for different transmission settings. **a.** aEIR=2; **b.** aEIR=10; **c.** aEIR=50; **d.** aEIR=200. Contours indicating the fever threshold (38°C) and 39°C are also shown. Variance estimates for these plots are presented in the supplementary materials.

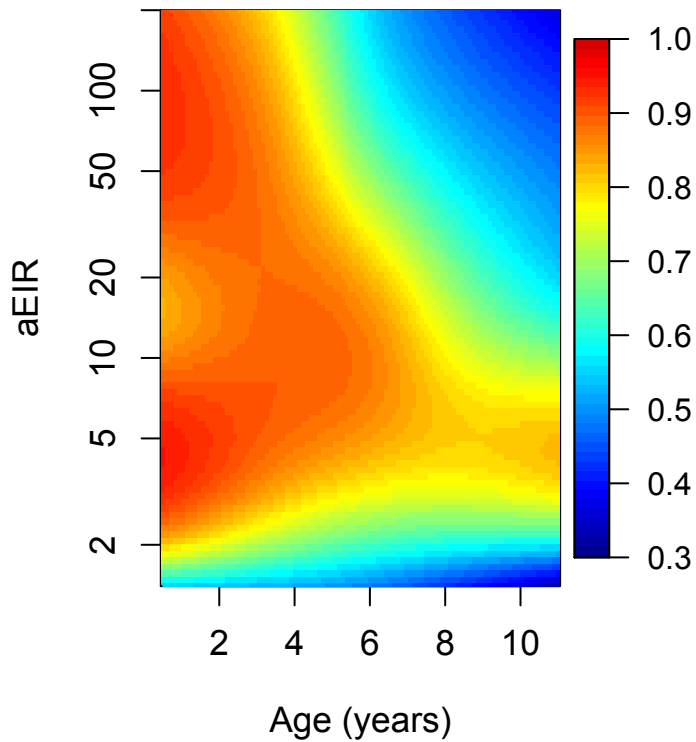

696  
697 Figure 7. Results of the best model exploring overall immunity against symptomatic  
698 malaria, as a function of age and exposure (aEIR).  
699 Colors represent the probability of developing symptomatic malaria upon infection.  
700 Variance estimates for these plots are presented in the supplementary materials.  
701
